# Supplementary material for: Selenium-driven enhancement of synergistic cancer chemo-/radiotherapy by targeting nanotherapeutics
Source: Royal Society of Chemistry journal article supplement (doi:10.1039/d1bm00348h), 2021-01-01
Supplement: d1bm00348h1.pdf [file d1bm00348h1.pdf]

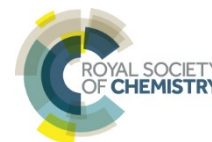

## Biomaterial Science

### ARTICLE

## Supporting information

for

### Selenium-Driven Enhancement of Synergistic Cancer Chemo-/radiotherapy by Targeting Nanotherapeutics

Xinxin Liu<sup>†</sup>, Zhongwen Yuan<sup>†</sup>, Zheng Tang, QI Chen, Jiarun Huang, Lizhen He\*, Tianfeng Chen \*

Department of Neurology and Stroke Center of The First Affiliated Hospital, and Department of Chemistry, Jinan University, Guangzhou 510632, China.

The Guangzhou Key Laboratory of Molecular and Functional Imaging for Clinical Translation, Guangzhou 510632, China.

<sup>†</sup> These authors contributed equally to this work.

\* To whom correspondence should be addressed.

**E-mail:** hlz6371@jnu.edu.cn, tchentf@jnu.edu.cn.

## Methods

**Stability Analysis:** Specific amounts of SeD@MSNs-FA were dissolved in specific volume water, fetal bovine serum (FBS), and DMEM containing 10% FBS. The size of SeD@MSNs-FA were measured and recorded at seven consecutive days by Nano particle size analyzer.

**Intracellular localization of SeD@MSNs-FA:** The fluorescence microscope (EVOS FL) was employed to observe localization of SeD@MSNs-FA in Hela cells at different time point. Briefly, the Hela cells ( $8 \times 10^4$  cells/ mL, 2 mL) were seeded into 2 cm culture dishes and allowed to adhere for 24 h, subsequently, incubated with SeD@MSNs-FA. The nucleus and lysosomes were labeled by DAPI (blue) and Lyso tracker (red) respectively.

**Hemolysis analysis:** Human red blood cells (RBCs) were incubated with different concentrations SeD@MSNs-FA for different time (4h,8h) periods at 37°C. PBS solution and Triton X-100 (10 mg/L) were used as negative and positive controls, respectively. The RBCs were centrifuged to collect supernatant for calculating the hemolysis rate. In the end, we used a microscope to observe the morphology of RBCs.

## Results

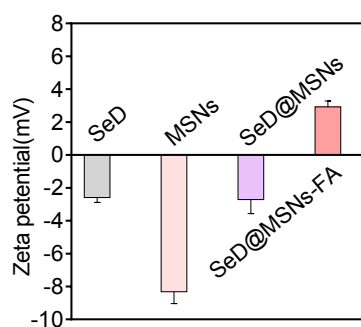

**Figure S1.** Zeta potential of SeD, MSNs, SeD@MSNs, SeD@MSNs and SeC@MSNs-FA nanoparticles

**Table S1.** Corresponding data table for MSNs and SeD@MSNs-FA.

| Samples     | Surface Area (m <sup>2</sup> /g) | Pore Volume (cm <sup>3</sup> /g) | Pore Size (nm) |
|-------------|----------------------------------|----------------------------------|----------------|
| MSNs        | 395.52                           | 0.84                             | 8.49           |
| SeD@MSNs-FA | 115.96                           | 0.18                             | 6.25           |

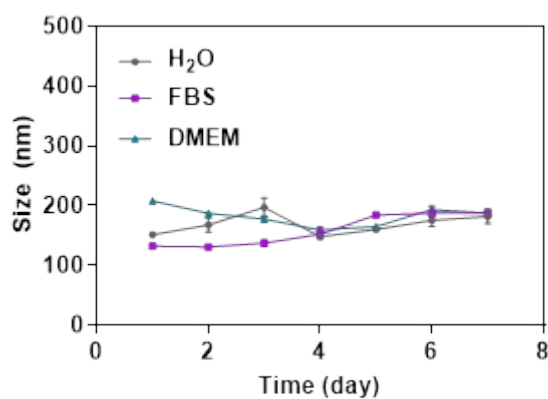

**Figure S2.** Stability of SeD@MSNs-FA in H<sub>2</sub>O, FBS, DMEM.

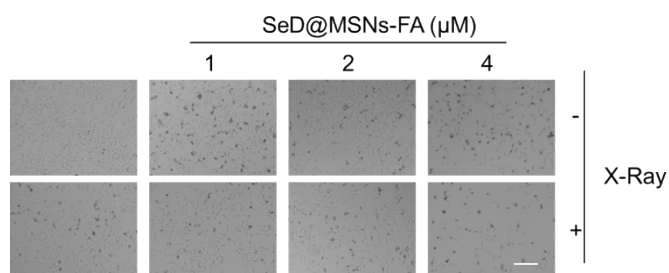

**Figure S3.** Morphology of HeLa cells after treatment with different concentrations (1, 2, and 4  $\mu\text{M}$ ) of SeD@MSNs-FA (24 h) and 4 Gy radiation. Scale bar is 200  $\mu\text{m}$ .

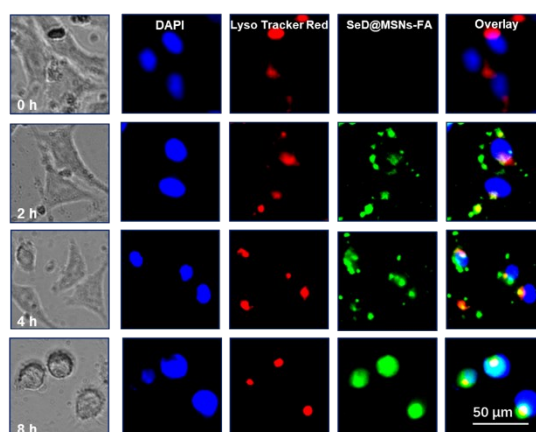

**Figure S4.** Fluorescence localization of SeD@MSNs-FA in HeLa cells. SeD@MSNs-FA produces a green fluorescence, LysoTracker red stained the lysosome, and PI stained the nucleus. The absorption of SeD@MSNs-FA into cells was observed under a fluorescent microscope at specific time points.

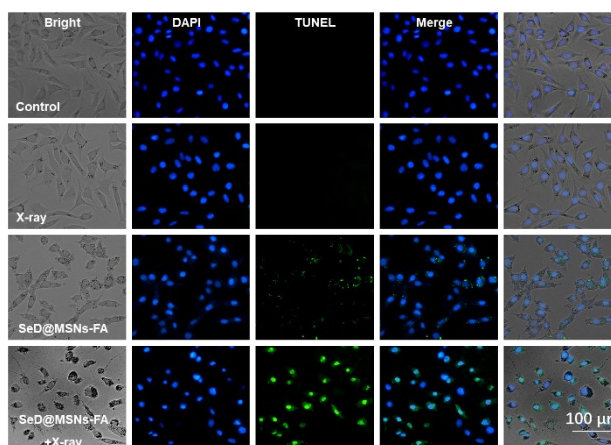

**Figure S5.** TUNEL and DAPI co-staining assay indicated that HeLa cells apoptosis occurred after treatment with SeD@MSNs-FA (1  $\mu\text{M}$ ) and radiation (2 Gy).

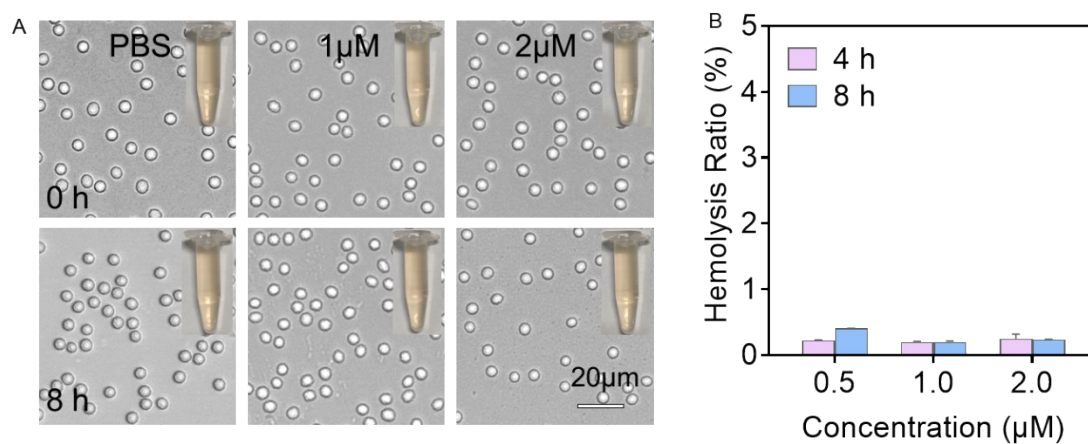

**Figure S6.** Compatibility of SeD@MSNs-FA with red blood cells. (A) Different concentration SeD@MSNs-FA (1  $\mu\text{M}$ , 2  $\mu\text{M}$ ) on the lysis of red blood cells at different time points, and (B) hemolysis rate.
